# Supplementary material for: Válvulas de final de línea: Las detipo "manga" o "pico de espátula"
Source: Royal Society of Chemistry journal article supplement (doi:10.1039/d3ra04143c), 2004-01-01
Supplement: d3ra04143c1.pdf [file d3ra04143c1.pdf]

## Supporting Information

### Enhanced charge transport properties of LFP/C/Graphite composite as cathode material for aqueous rechargeable lithium battery

*Wenyuan Duan<sup>a</sup>, Mubasher<sup>b</sup>, Yanlin Li<sup>\*c</sup>, Najeeb ur Rehman Lashari<sup>\*d, e</sup>, Yuhuan*

*Yang<sup>a</sup>, Cheng Ma<sup>a</sup>, Yuzhen Zhao<sup>a</sup>, Xiaorui Li<sup>f</sup>*

<sup>a</sup> *Xi'an Key Laboratory of Advanced Photo-electronics Materials and Energy Conversion Device, Xijing University, Xi'an 710123, China.*

<sup>b</sup> *Materials Research Laboratory, Department of Physics, Faculty of Sciences (FOS), International Islamic University (IIU), H-10 Islamabad 44000, Pakistan*

<sup>c</sup> *School of Materials Science and Engineering, Xi'an University of Architecture & Technology, Xi'an 710055, China. **Email: liyanlin@xauat.edu.cn***

<sup>d</sup> *Institute for Advanced Study, Shenzhen University, Shenzhen, 518060, China. **Email: najeeblashari@xpu.edu.cn***

<sup>e</sup> *Department of chemistry and physics, Jackson State University, USA.*

<sup>f</sup> *School of Environmental and Chemical Engineering, Jiangsu University of Science and Technology, Zhenjiang, 212114, P. R. China.*

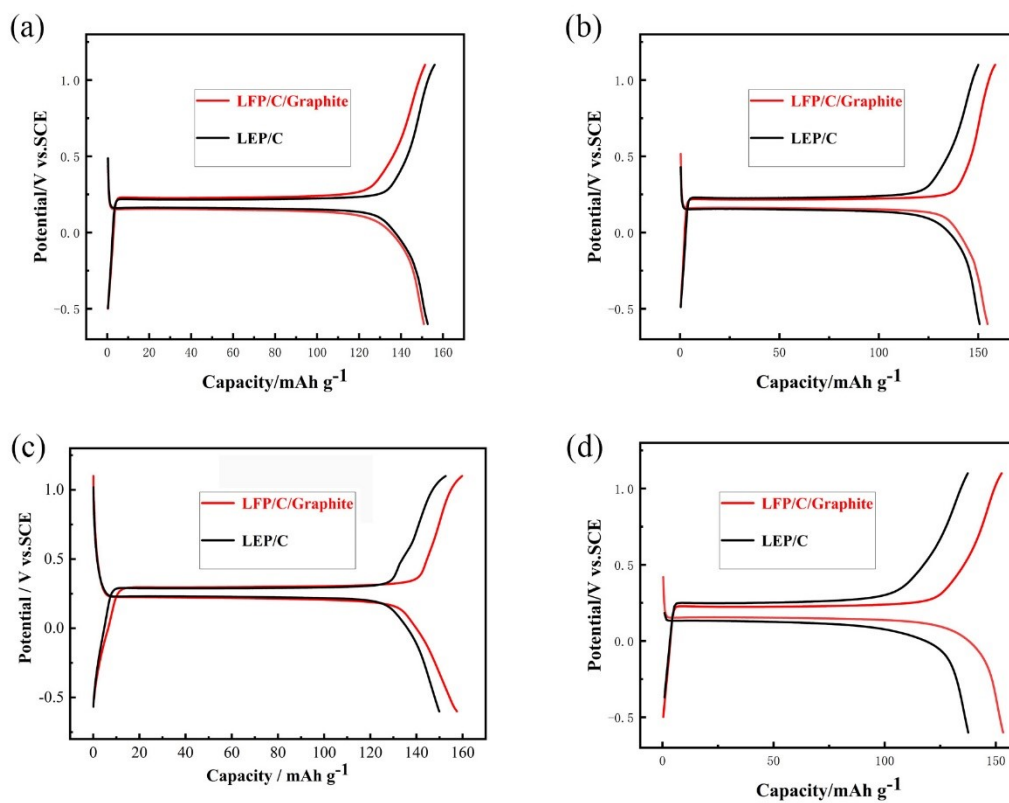

Fig. S1. The 1st, 2nd, 10th, 50th charge/discharge profiles of LFP/C and LFP/C/Graphite composites at 1C current density. (a) The 1st charge/discharge profiles. (b) The 2nd charge/discharge profiles. (c) The 10th charge/discharge profiles. (d) The 50th charge/discharge profiles.

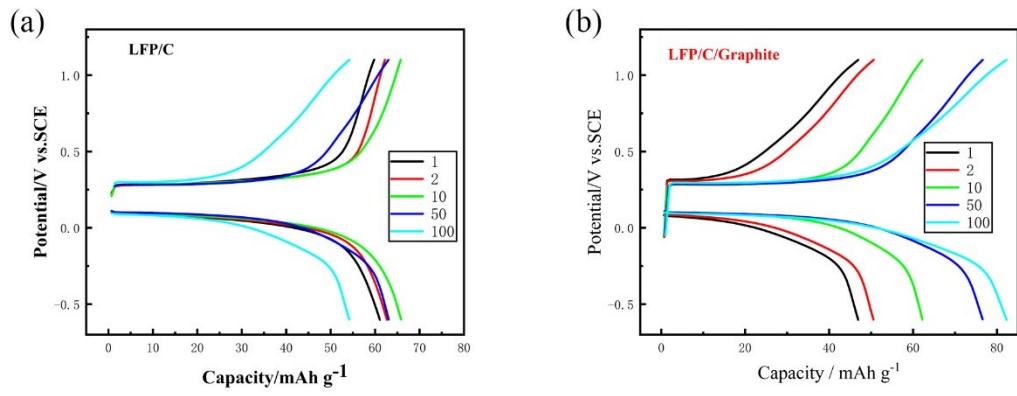

Fig. S2. The 1st, 2nd, 10th, 50th, 100th charge/discharge profiles of LFP/C and LFP/C/Graphite composites at 50C current density. (a) The charge/discharge profiles LFP/C composites. (b) The charge/discharge profiles LFP/C/Graphite composites.

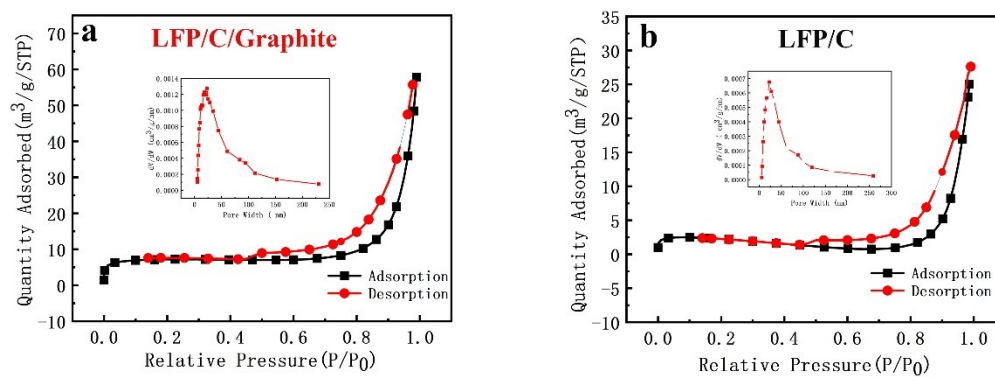

Fig. S3.  $\text{N}_2$  adsorption–desorption isotherms and pore size distribution of (a) LFP/C/Graphite and (b) LFP/C.
